# Supplementary material
Source: Research Square preprint supplement (doi:10.21203/rs.3.rs-9095597/v1)
Supplement: Supplementary file 1 [file 0a2af05ad12beca09be70678.docx]

Table 1 Baseline characteristics of pediatric anesthetics included in the study

| **Variable** | **Value** |
| --- | --- |
| Total pediatric cases | 3230 |
| Age median (IQR) | 4.61 (2.1–8.0) |
| Male | 2140 (66.3%) |
| Female | 1090 (33.7%) |

ASA status

| **ASA** | **n (%)** |
| --- | --- |
| I | 425 (13.2%) |
| II | 2274 (70.4%) |
| III | 478 (14.8%) |
| IV | 50 (1.5%) |
| V | 3 (0.1%) |

Table 2 Surgical categories of procedures performed

| **Procedure** | **n (%)** |
| --- | --- |
| Upper limb fracture | 465 (14.4%) |
| Lower limb fracture | 36 (1.1%) |
| Inguinal hernia repair | 650 (20.1%) |
| Gastrointestinal emergency | 371 (11.5%) |
| Airway foreign body | 677 (21.0%) |
| Trauma / wound surgery | 499 (15.4%) |
| Ophthalmologic surgery | 377 (11.7%) |
| Other | 155 (4.8%) |

Table 3 Distribution of preoperative fasting duration

| **Fasting duration** | **n (%)** |
| --- | --- |
| <2 h | 178 (5.5%) |
| 2–4 h | 686 (21.2%) |
| 4–6 h | 1260 (39.0%) |
| 6–8 h | 901 (27.9%) |

Table 4 Type of last oral intake before anesthesia

| **Intake type** | **n (%)** |
| --- | --- |
| Clear liquids | 455 (14.1%) |
| Breast milk | 231 (7.2%) |
| Formula | 245 (7.6%) |
| Solid food | 2201 (68.1%) |
| Unknown | 98 (3.0%) |

Table 5 Airway management strategies during anesthesia

| **Variable** | **n (%)** |
| --- | --- |
| Initial supraglottic airway | 2763 (85.6%) |
| Initial endotracheal intubation | 467 (14.4%) |
| SGA converted to ETT | 93 (3.4%) |
| Final supraglottic airway | 2670 (82.7%) |
| Final endotracheal intubation | 560 (17.3%) |
